# Supplementary material for: Safety and efficacy of nivolumab plus ipilimumab in patients with advanced non-clear cell renal cell carcinoma: results from the phase 3b/4 CheckMate 920 trial
Source: PubMed Central journal article supplement — J Immunother Cancer. 2022 Feb 24;10(2):e003844. doi: 10.1136/jitc-2021-003844 (PMC8883262; doi:10.1136/jitc-2021-003844), 2022-02-24
Supplement: jitc-2021-003844supp001.pdf [file jitc-2021-003844supp001.pdf]

Data Supplement – Online Only Appendix

Tykodi SS, et al. Safety and efficacy of nivolumab plus ipilimumab in patients with advanced non-clear cell renal cell carcinoma: results from the phase 3b/4 CheckMate 920 trial

| Table of contents                                                                                                                   | Page |
|-------------------------------------------------------------------------------------------------------------------------------------|------|
| Table S1 Treatment exposure in all treated patients                                                                                 | 2    |
| Figure S1 Patient disposition                                                                                                       | 3    |
| Figure S2 Best reduction from baseline in the sum of the diameter of target lesions                                                 | 4    |
| Figure S3 Kaplan–Meier plot of PFS-2 per investigator assessment in patients treated beyond initial RECIST v1.1-defined progression | 5    |

This supplementary material has been provided by the authors to give readers additional information about their work

**Table S1** Treatment exposure in all treated patients

| <b>Exposure</b>                                       | <b>Nivolumab<br/>(N=52)</b> | <b>Ipilimumab<br/>(N=52)</b> |
|-------------------------------------------------------|-----------------------------|------------------------------|
| <b>Median duration of therapy<br/>(range), months</b> | 3.5 (0.0–25.8)              | 2.1 (0.0–3.9)                |
| <b>Relative dose intensity, n (%)</b>                 |                             |                              |
| 90% to <110%                                          | 45 (86.5)                   | 45 (86.5)                    |
| 70% to <90%                                           | 6 (11.5)                    | 6 (11.5)                     |
| 50% to <70%                                           | 0                           | 0                            |
| <50                                                   | 1 (1.9)                     | 1 (1.9)                      |
| <b>Median no. of doses (range)</b>                    | 4.5 (1–28)                  | 4.0 (1–4)                    |
| <b>No. of doses received, n (%)</b>                   |                             |                              |
| 1                                                     | 5 (9.6)                     | 5 (9.6)                      |
| 2                                                     | 4 (7.7)                     | 4 (7.7)                      |
| 3                                                     | 6 (11.5)                    | 7 (13.5)                     |
| 4                                                     | 11 (21.2)                   | 36 (69.2)                    |
| ≥5                                                    | 26 (50.0)                   | 0                            |

**Figure S1** Patient disposition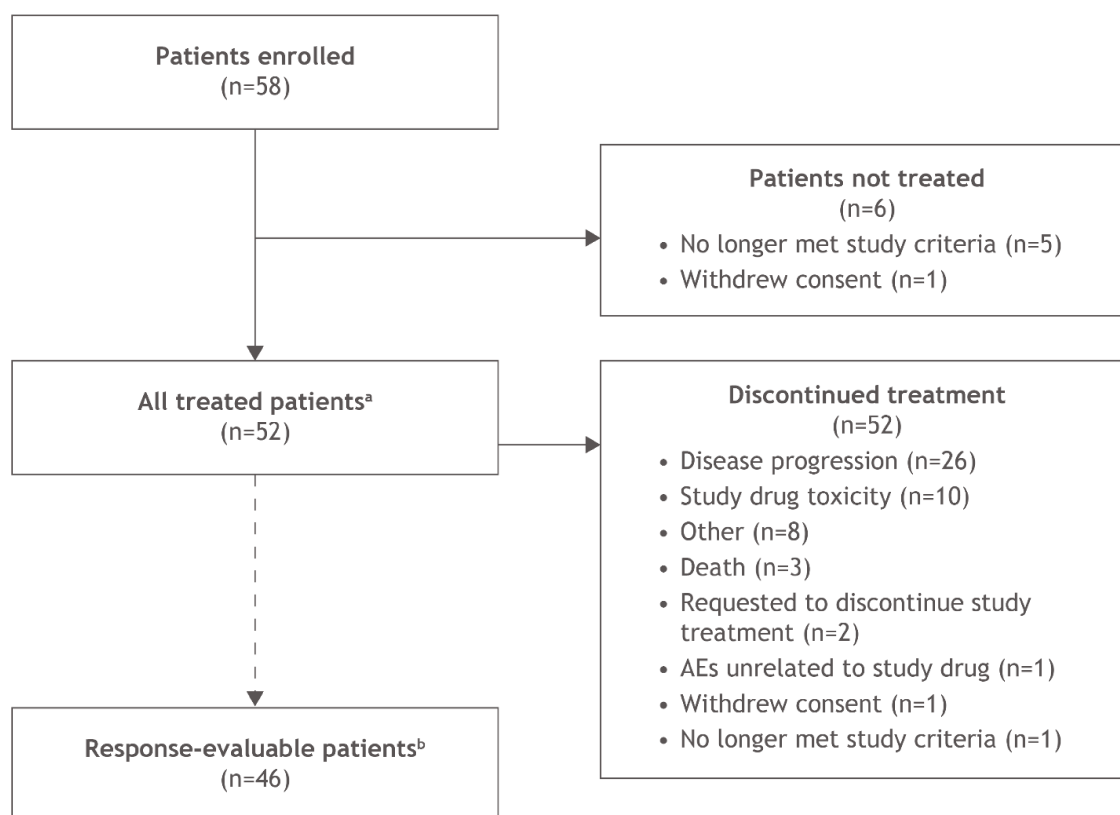

<sup>a</sup>All enrolled patients who received any nivolumab. <sup>b</sup>All treated patients who had baseline and at least one on-study evaluable tumor measurement.

**Figure S2** Best reduction from baseline in the sum of the diameter of target lesions in response-evaluable patients

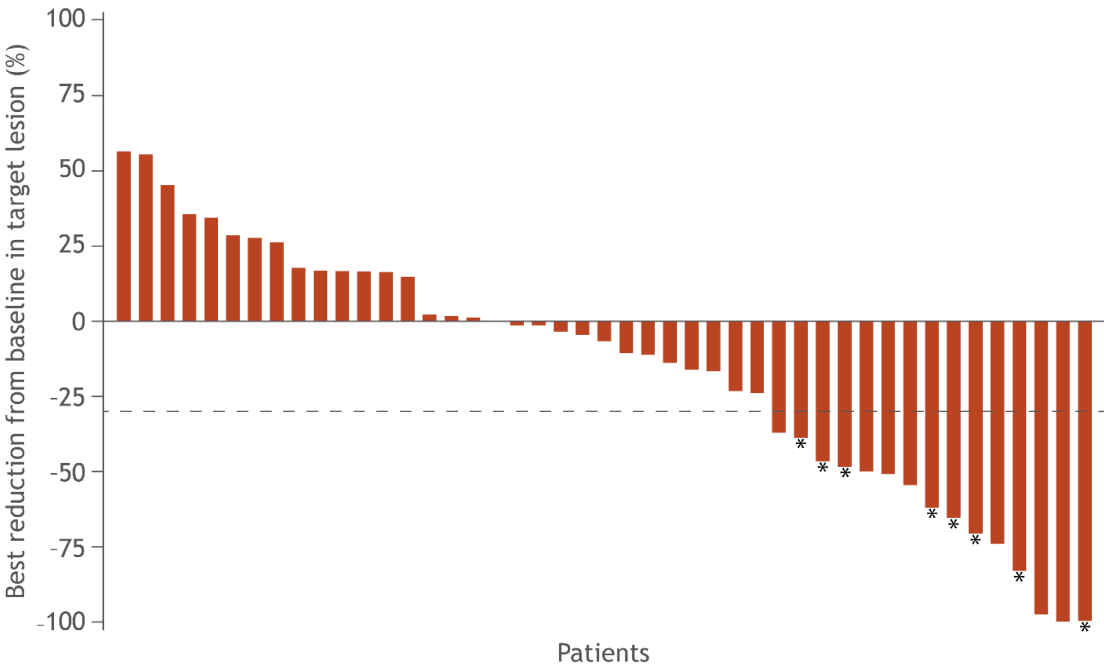

\*Responder per RECIST v1.1 criteria, confirmation of response required. Horizontal reference line indicates the 30% reduction consistent with a RECIST v1.1 response.

Includes patients with a target lesion at baseline and  $\geq 1$  evaluable target lesion assessment on study. Negative/positive value indicates maximum tumor reduction/minimum tumor increase. Best reduction is based on evaluable target lesion measurements up to progression or start of subsequent therapy date (excluding on-treatment palliative radiotherapy of nontarget central nervous system or bone lesions). One response-evaluable patient did not have available data on best reduction from baseline in the sum of the diameter of target lesions.

RECIST, Response Evaluation Criteria in Solid Tumors.

**Figure S3** Kaplan–Meier plot of PFS-2 per investigator assessment in patients treated beyond initial RECIST v1.1-defined progression

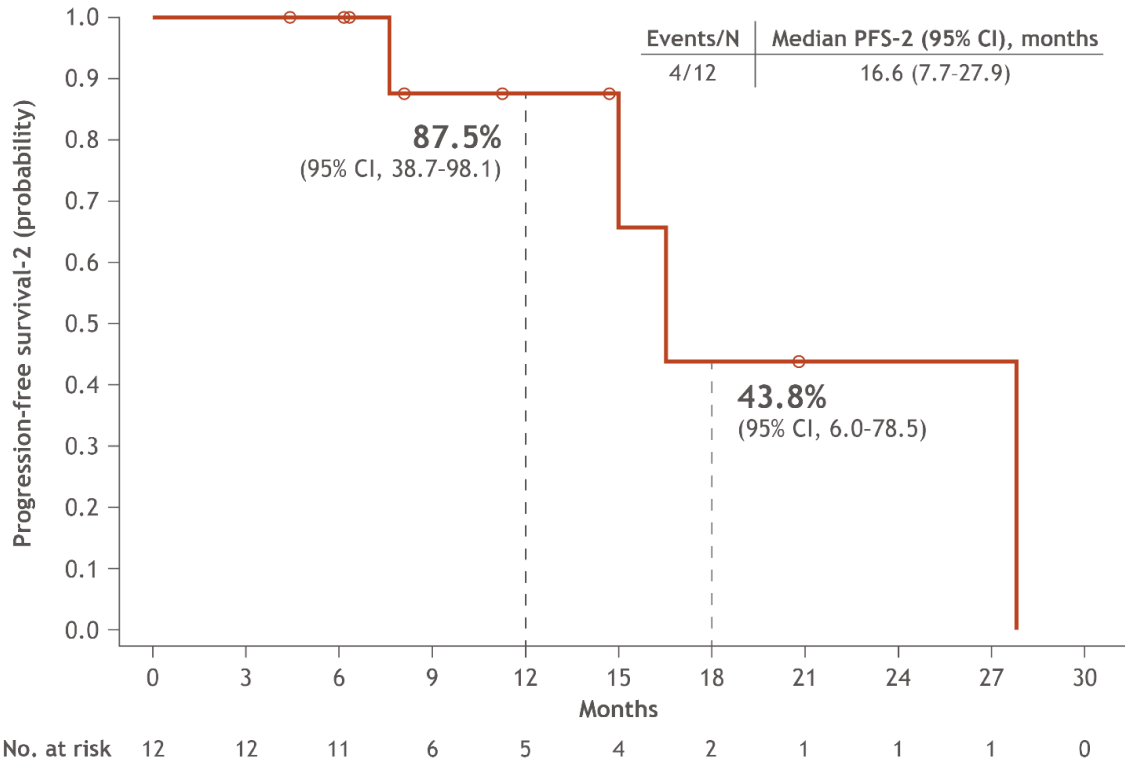

PFS-2 for patients treated beyond initial RECIST v1.1-defined progression was the time from baseline to the imaging-confirmed second progression (defined as an additional 20% increase in tumor volume from time of initial progression; including the sum of all target lesions and/or the development of new measurable lesions) or death from any cause, whichever occurred first. PFS-2 by IMDC risk is not shown due to small sample sizes (favorable, n=5; intermediate, n=5; poor, n=2).  
CI, confidence interval; PFS-2, progression-free survival-2; RECIST, Response Evaluation Criteria in Solid Tumors.
